# Supplementary material for: Measuring the Effect of Circular Public Procurement on Government’s Environmental Impact
Source: MDPI journal article supplement (doi:10.3390/su141610271), 2022-08-18
Supplement: s1 [file s1]

Archive with 1 entries (1 files):
- sustainability-1795827-supplementary.pdf
