# Supplementary material for: Measuring the Effect of Circular Public Procurement on Government’s Environmental Impact
Source: MDPI journal article supplement (doi:10.3390/su141610271), 2022-08-18
Supplement: s1 [file s1 › sustainability-1795827-supplementary.pdf]

SUPPLEMENTARY INFORMATION

Supplementary Materials S1: Analysis of criteria found in the sample

*Table S1 List of words used for the text mining of the tenders per product group. The words are in Dutch because the tender texts are in Dutch.*

| Search term                | Productgroup |
|----------------------------|--------------|
| Afgedankte Work wear       | Work wear    |
| AOX – OX                   | Work wear    |
| Biotextiel                 | Work wear    |
| CFK                        | Work wear    |
| Convenant                  | Work wear    |
| Duurzaam inkopen Work wear | Work wear    |
| Gehalogeneerd              | Work wear    |
| ISO Work wear              | Work wear    |
| Öko-Tex                    | Work wear    |
| RCS                        | Work wear    |
| Reinigen                   | Work wear    |
| Textielvezels              | Work wear    |
| Waterzuivering             | Work wear    |
| COC                        | Buildings    |
| DuboCalc                   | Buildings    |
| Duurzaamheidscategorie     | Buildings    |
| Duurzaamheidsprestatie     | Buildings    |
| Energiewinning             | Buildings    |
| FSC                        | Buildings    |
| Inbouwpakket               | Buildings    |
| Levensduurverlenging       | Buildings    |
| Milieubeheermaatregelen    | Buildings    |
| Milieubelasting            | Buildings    |
| Milieuwet- en regelgeving  | Buildings    |
| MPG                        | Buildings    |
| MTCS                       | Buildings    |
| PEFC                       | Buildings    |
| SFM                        | Buildings    |
| Sociale voorwaarden        | Buildings    |
| STIP                       | Buildings    |
| TPAC                       | Buildings    |
| Duurzame teelt             | Furniture    |
| Levensduur                 | Furniture    |

| Search term                | Productgroup      |
|----------------------------|-------------------|
| Reinigingsmiddelen         | Furniture         |
| Toegankelijkheid           | Furniture         |
| Verpakkingsmateriaal       | Furniture         |
| <i>Close the loop</i>      | ICT hardware      |
| Duurzame                   | ICT hardware      |
| <i>Energy star</i>         | ICT hardware      |
| Grondstoffen               | ICT hardware      |
| Gerecyclede content        | ICT hardware      |
| Reserve-onderdelen         | ICT hardware      |
| Verpakkingen               | ICT hardware      |
| Brandstoffen               | Cars              |
| Criteria                   | Cars              |
| EEV                        | Cars              |
| Emissies                   | Cars              |
| Overige maatregelen        | Cars              |
| Asfalt                     | Road construction |
| COC                        | Road construction |
| Duurzaamheidscategorie     | Road construction |
| Duurzaamheidsprestatie     | Road construction |
| Emissiegrenswaarden        | Road construction |
| Energiebron                | Road construction |
| Energiewinning             | Road construction |
| Flexibel inbouwpakket      | Road construction |
| FSC                        | Road construction |
| Grondbalans                | Road construction |
| KOMO                       | Road construction |
| Levensduurverlenging       | Road construction |
| Milieubeheermaatregelen    | Road construction |
| Milieubelasting            | Road construction |
| Milieuklassen              | Road construction |
| Milieuprestatie            | Road construction |
| Milieuvriendelijke coating | Road construction |
| Milieuwet- en regelgeving  | Road construction |
| MTCS                       | Road construction |
| Opslag                     | Road construction |
| PEFC                       | Road construction |
| SFM                        | Road construction |
| Sociale voorwaarde         | Road construction |
| STIP                       | Road construction |
| TPAC                       | Road construction |

| Search term                 | Productgroup         |
|-----------------------------|----------------------|
| 2009/28/EG                  | Solar Panels         |
| Afvalbeheer                 | Solar Panels         |
| Hernieuwbare energiebronnen | Solar Panels         |
| Onderhoudsplan              | Solar Panels         |
| PV-cycle                    | Solar Panels         |
| Recyclingprogramma          | Solar Panels         |
| Tüv-certificaat             | Solar Panels         |
| Verduurzaming               | Solar Panels         |
| Afvalstoffen                | General search terms |
| Biobased                    | General search terms |
| Biobrandstoffen             | General search terms |
| C2C                         | General search terms |
| Circulariteit               | General search terms |
| CO <sub>2</sub>             | General search terms |
| Demontage                   | General search terms |
| Duurzaam                    | General search terms |
| Duurzaam2                   | General search terms |
| Duurzaam3                   | General search terms |
| Ecologisch                  | General search terms |
| Emissienorm                 | General search terms |
| Energieterugwinning         | General search terms |
| ERU – VER                   | General search terms |
| <i>Fairtrade</i>            | General search terms |
| FSC                         | General search terms |
| Geluid                      | General search terms |
| Gevaarlijke stoffen         | General search terms |
| Grenswaarden                | General search terms |
| Groene stroom               | General search terms |
| GvO                         | General search terms |
| Herbruikbaar                | General search terms |
| ILO – ISV                   | General search terms |
| ISO14001                    | General search terms |
| Klimaat                     | General search terms |
| LCA                         | General search terms |
| Milieu                      | General search terms |
| MKI                         | General search terms |
| MVO – MVI                   | General search terms |
| Nano                        | General search terms |
| PIANOo                      | General search terms |
| Recycling                   | General search terms |

| Search term         | Productgroup         |
|---------------------|----------------------|
| Refurbished         | General search terms |
| Reststoffen         | General search terms |
| Restwaarde          | General search terms |
| Retour              | General search terms |
| <i>Second life</i>  | General search terms |
| SROI                | General search terms |
| <i>Supply chain</i> | General search terms |
| TCO                 | General search terms |
| Verpakkingen        | General search terms |
| Waardebehoud        | General search terms |
| Water               | General search terms |
| WEEE                | General search terms |

*Table S2 overview of criteria found in the sample of 72 tenders, the circularity (R) strategy stimulated with the criteria, the number of tenders that apply the criteria, the number of tenders in which the criteria was also operationalized during the contract phase, the number of tenders in which the criteria was applied in a more ambitious way than common practice and the number of tenders for which the effect of the criteria could be estimated. R2 = Reduce, R3 = Reuse, R4 = Repair, R5 = Refurbish, R8a = recycled content, R8b = recyclability.*

| Product group     | Criteria                                                                                        | R strategy | N Tenders | Operational | > common practice | effect measured |
|-------------------|-------------------------------------------------------------------------------------------------|------------|-----------|-------------|-------------------|-----------------|
| Buildings         | Require a BREEAM sustainability score                                                           | General    | 2         | 2           | ?                 | 0               |
| Buildings         | Reuse of clinkers                                                                               | R3         | 1         | 1           | 0                 | 1               |
| Buildings         | Secondary materials are removed as monostreams. This increases the chance of reuse or recycling | R8b        | 1         | 1           | 0                 | 1               |
| Cars              | Plan with circularity measures                                                                  | General    | 1         | 0           | ?                 | 1               |
| Furniture         | Guarantee a product with a longer life span: 15 instead of 10                                   | R2         | 2         | 2           | 2                 | 2               |
| Furniture         | Guarantee a product with a longer life span: 20 instead of 10                                   | R2         | 3         | 3           | 3                 | 2               |
| Furniture         | Repair service contract                                                                         | R4         | 6         | 6           | ?                 | 0               |
| Furniture         | Easy disassembling of parts. This increases the repair and recycle opportunities.               | R4, R8b    | 6         | ?           | ?                 | 0               |
| Furniture         | Refurbishment of old furniture instead of supplying new                                         | R5         | 2         | 2           | 2                 | 1               |
| Furniture         | Product with recycled content                                                                   | R8a        | 1         | 1           | 1                 | 0               |
| Furniture         | Take recycling after use into account in the design                                             | R8b        | 2         | 0           | 2                 | 2               |
| Furniture         | Supplier also (partly) responsible for maintenance. This might result in a longer life span.    | R2         | 4         | 4           | ?                 | 0               |
| ICT hardware      | One year longer guarantee                                                                       | R2         | 1         | ?           | 1                 | ?               |
| ICT hardware      | Spare parts are available for at least ## years                                                 | R4         | 8         | 8           | 0                 | 8               |
| ICT hardware      | Supply of refurbished devices possible within contract                                          | R5         | 1         | ?           | 1                 | ?               |
| Road construction | Require a carbon performance ladder certificate                                                 | General    | 4         | 4           | 3                 | 4               |
| Road construction | Apply a technique that increases the life span of the roads                                     | R2         | 1         | 0           | 1                 | 1               |
| Road construction | Use concrete with higher content of recycled concrete                                           | R8a        | 2         | 0           | 2                 | 2               |
| Road construction | Secondary materials are removed as monostreams. This increases the chance of reuse or recycling | R8b        | 2         | 2           | 0                 | 2               |
| Solar Panels      | PID free solar panels IEC 62804                                                                 | R2         | 2         | 2           | 0                 | 2               |
| Solar Panels      | Membership of a foundation which arranges dismantling and recycling after use                   | R8b        | 4         | 4           | 0                 | 4               |
| Work wear         | Repair service contract                                                                         | R4         | 2         | 2           | ?                 | 0               |
| Work wear         | Product with recycled content                                                                   | R8a        | 3         | 3           | 3                 | 2               |
| Work wear         | Recollect work wear after disposal                                                              | R8b        | 1         | 0           | 0                 | 1               |
|                   |                                                                                                 |            | <b>62</b> | <b>47</b>   | <b>21</b>         | <b>36</b>       |

## Supplementary Materials S2: Data used for calculations

This appendix contains details on the calculations of the realized effect of CPP in 2017-2018 in the Netherlands and the potential effect of a selection of CPP measures when applied to all tenders within that time-period for the product groups Buildings, Furniture, Road construction and Workwear. This information is again a summary of background documents (in Dutch):

- Furniture and Road construction: Zijp et al., 2020: <https://www.rivm.nl/bibliotheek/rapporten/2020-0002.html> (latest access 19-05-2021)
- Workwear: CE Delft, 2021: [https://ce.nl/wp-content/uploads/2021/03/CE\\_Delft\\_200147\\_Effect\\_meten\\_van\\_circulair\\_inkopen\\_bedrijfsklaring\\_Def.pdf](https://ce.nl/wp-content/uploads/2021/03/CE_Delft_200147_Effect_meten_van_circulair_inkopen_bedrijfsklaring_Def.pdf) (latest access 19-05-2021)
- Buildings: RIVM, 2021: <https://www.rivm.nl/maatschappelijk-verantwoord-inkopen/effect-circulair-inkopen> (latest access 19-05-2021)

### Buildings-Potential

Scenario: Replacing 50% of CEM I concrete with CEM III concrete or replacing sand and gravel with concrete granulate.

Amount of office buildings build every year: 34484 m<sup>2</sup>

Total GHG saved when all new office buildings are build using CEM III concrete: 311 ton CO<sub>2</sub>-eq

Total materials saved when all new office buildings are build using CEM III concrete: 595 ton

Extra GHG emissions when all new office buildings are build using concrete granulate: 19 ton CO<sub>2</sub>-eq

Total materials saved when all new office buildings are build using concrete granulate: 3700 ton

Total GHG saved when scenarios combined: 282 ton CO<sub>2</sub>

Total materials saved when scenarios combined: 4200 ton

### Furniture realized

Longlist: 162 tenders; € 345 million

Sample: 10 tenders; € 69 million

Circularity strategy: extended life time (R2), refurbishing (R5)

Type of furniture: chairs, desks, tables

Material: plastics, wood, steel, iron, polyester

Reference profiles for new and refurbished furniture:

| Type of furniture (new) | Weight (kg) | CO <sub>2</sub> -eq emissions (kg) | New material (kg) | Recycled material (kg) | Biobased material (kg) |
|-------------------------|-------------|------------------------------------|-------------------|------------------------|------------------------|
| Desk chair              | 18,54       | 100,9                              | 10,43             | 8,11                   | -                      |
| Chair                   | 7,24        | 32,3                               | 5,76              | 0,78                   | 0,67                   |
| Desk type 1             | 50,11       | 117,9                              | 29,95             | 4,72                   | 15,44                  |
| Desk type 2             | 55,55       | 152,2                              | 35,55             | 5,96                   | 14,03                  |
| Table                   | 47,35       | 78,9                               | 16,91             | 4,43                   | 26,01                  |
| Cabinet                 | 100,3       | 257,4                              | 61,38             | 35,25                  | 3,67                   |

Source: DGBC, 2021b

| Type of furniture (refurbished) | Weight (kg) | CO2-eq emissions (kg) | New material (kg) | Re-used material (kg) | Recycled material (kg) | Biobased material (kg) |
|---------------------------------|-------------|-----------------------|-------------------|-----------------------|------------------------|------------------------|
| Desk chair                      | 18,53       | 11,7                  | 1,04              | 16,62                 | 0,87                   | -                      |
| Chair                           | 7,24        | 3,80                  | 0,49              | 6,32                  | 0,32                   | 0,09                   |
| Desk type 1                     | 50,11       | 12,68                 | 0,78              | 41,76                 | 0,13                   | 6,29                   |
| Desk type 2                     | 55,55       | 13,86                 | 3,27              | 41,54                 | 0,41                   | 6,58                   |
| Table                           | 47,35       | 23,47                 | 2,97              | 23,97                 | 0,46                   | 19,95                  |
| Cabinet                         | 100,6       | 71,89                 | 1,35              | 4,11                  | 0,33                   | -                      |

Source: DGBC, 2021b

Total material saved sample: 130 ton

Total GHG saved sample: 630 ton CO<sub>2</sub>-eq

Total material saved extrapolated: 590 ton

Total GHG saved extrapolated: 2.960 ton CO<sub>2</sub>-eq

### Furniture potential

Scenarios:

| Type of scenario               | Material saved (kg) | CO2-eq emissions reduction (kg) |
|--------------------------------|---------------------|---------------------------------|
| Extended life time of 10 years | 9000                | 51000                           |
| Refurbished 5%                 | 140                 | 760                             |
| Refurbished 10%                | 360                 | 1900                            |

Total GHG saved potentially: 53.000 ton CO<sub>2</sub>-eq

Total material saved: 9.400 ton

### Road construction realized

Longlist: 222 tenders; € 1249 million

Sample: 10 tenders; €49 million

Circularity strategy: Longer life expectancy in 1 tender; More recycled content in 3 tenders

Type of roads: Highways, provincial roads an municipal roads

Total material saved sample: 11.460 ton

Total GHG saved sample: 870 ton CO<sub>2</sub>-eq

Total material saved extrapolated: 291.580 ton

Total GHG saved extrapolated: 23.840 ton CO<sub>2</sub>-eq

### Road construction potential

Scenario: extended life expectancy or additional recycled content

Life expectancy reference: 11 years right lane (highway); 17 years left lane (highway); 15 years (other roads)

Life expectancy extended: 17 years right lane; 17 years left lane; 20 years (others)

Total acreage of asphalt roads: 81.780 km; 5.866 km of highway and 75914 km of other roads

| Material             | GWP (kg CO <sub>2</sub> -eq/ton asphalt) | Source |
|----------------------|------------------------------------------|--------|
| Reference            | 86                                       | R10814 |
| Extended lifetime    | 86                                       | R10814 |
| 50% recycled content | 69                                       | R10814 |

Amount of GHG spared when all roads have extended life expectancy: 315.355 ton CO<sub>2</sub>-eq

Amount of materials spared when all roads have extended life expectancy: 3.698.782 ton

Amount of GHG spared when all roads have 50% recycled content: 285.870 ton CO<sub>2</sub>-eq

Amount of materials spared when all roads have 50% recycled content: 8.010.225 ton

### Workwear-realised

Longlist: 93 tenders; € 82 million

Sample: 10 tenders; € 7 million

Circularity strategy: recycled content in 3 tenders

Type of clothing: sweaters, polo's, overalls, trousers, shirts, jackets, socks

Material: replace virgin polyester and polyamide by recycled polyester and polyamide

Weight of materials per type of clothing: Table below, based on Rodrigues, R. et al., 2017.

| Type of clothing | Weight (gram) | Material                                            |
|------------------|---------------|-----------------------------------------------------|
| Sweater          | 550           | 100% cotton                                         |
| Polo             | 250           | 100% polyester                                      |
| Overall          | 760           | 100% cotton                                         |
| Trouser type 1   | 680           | 100% cotton                                         |
| Trouser type 2   | 500           | 100% polyester                                      |
| Shirt            | 240           | 100% cotton                                         |
| Jacket           | 500           | 100% polyester                                      |
| Sock type 1      | 100           | 27% recycled polyamide / 73% other*                 |
| Sock type 2      | 100           | 24% recycled polyester / 23% polyamide / 53% other* |

LCA data:

| Material                    | GWP (kg CO <sub>2</sub> -eq/per kg) | Source                    |
|-----------------------------|-------------------------------------|---------------------------|
| Polyester (PET/PES)         | 3,0                                 | Ecoinvent database v.3.5  |
| Recycled polyester (rPET)   | 0,3                                 | CE Delft, 2015*           |
| Polyamide (PA/nylon)        | 9,2                                 | Ecoinvent database, v.3.5 |
| Recycled polyamide (Econyl) | 1,7                                 | EPD Econyl, 2018          |
| Cotton, conventional        | 3,3                                 | Ecoinvent database, v.3.5 |
| Recycled cotton             | 0,4                                 | Modint Ecotool**          |

|                   |      |                           |
|-------------------|------|---------------------------|
| Biological cotton | 1,0  | PE International, 2014    |
| Wool              | 38,0 | Ecoinvent database, v.3.5 |
| Recycled wool     | 0,7  | Spinelli, 2018***         |

\*CE Delft, 2011. LCA: recycling van kunststof verpakingsafval uit huishoudens, Delft: CE Delft.

\*\*INretail, Modint en VGT, 2019. Op weg naar een circulaire keten: Sectorplan Nederlandse kleding- en textielsector.

Available at: [https://assets.website-files.com/5d7b6ad83a8c253b394ddbae/5dc01f739bf13ea3f357f29f\\_Sectorplan\\_Nederlandse\\_Kleding-en\\_Textiel\\_Sector\\_sept2019.pdf](https://assets.website-files.com/5d7b6ad83a8c253b394ddbae/5dc01f739bf13ea3f357f29f_Sectorplan_Nederlandse_Kleding-en_Textiel_Sector_sept2019.pdf) [Geopend 2020].

\*\*\*Spinelli, R., 2018. Data obtained via direct communication with R. Spinelli, author of the study 'Environmental Footprint of Production of Recycled Wool' [Interview] 2018.

\*\*\*Spinelli, R., 2018. Data obtained via direct communication with R. Spinelli, author of the study 'Environmental Footprint of Production of Recycled Wool' [Interview] 2018.

Total material saved sample: 7.082 kg

Total GHG saved sample: 32.322 kg CO2-eq

Total material saved extrapolated: 82 ton

Total GHG saved extrapolated: 380 ton CO2-eq

### **Workwear-potential**

Scenario: 10% recycled material for all purchased clothing by the government

Total purchase of clothing: data available on which data in which amount were purchased for 52 of the 93 tenders. Weight was estimated based on the table above. Total weight was estimated by extrapolation the weight for the 52 tenders to the 93 by the financial ratio.

General share of type of materials in clothing was taken from national database: CPB, 2019. Textiel als secundaire grondstof, Den Haag: Centraal Planbureau (CPB):

- 64% cotton
- 5% viscose
- 19% polyester
- 5% polyamide
- 1% wool
- 6% other

It was assumed that no recycled material was applied for the material groups viscose and other.

LCA data: see table above

Total estimated material saved when the whole Dutch government purchases work wear with 10% recycled content: 190 ton

Total estimated GHG emissions saved when the whole Dutch government purchases work wear with 10% recycled content: 600 ton
